# Supplementary material for: Oxidative cleavage of benzylic C–N bonds under metal-free conditions
Source: Royal Society of Chemistry journal article supplement (doi:10.1039/c4ob01633e), 2014-01-01

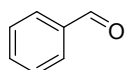

$^1\text{H NMR}$  (400 MHz,  $\text{CDCl}_3$ )  $\delta$  10.00 (s, 1H), 7.94-7.82 (m, 2H), 7.67-7.56 (m, 1H), 7.51 (t,  $J$  = 7.5 Hz, 2H). GC-MS (EI, 70 ev)  $m/z$  (%) =106.0([M]<sup>+</sup>, 100), 105.0(92), 78.1(17), 77.1(84), 51(30).

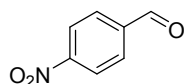

$^1\text{H NMR}$  (400 MHz,  $\text{CDCl}_3$ )  $\delta$  10.16 (s, 1H), 8.40 (d,  $J$  = 8.3 Hz, 2H), 8.08 (d,  $J$  = 8.2 Hz, 2H). GC-MS (EI, 70 ev)  $m/z$  (%) =152.1 ([M]<sup>+</sup>, 10), 151.1(100), 150.1(93), 120.1(12), 105.1(17), 104.1(14), 77.1(40), 76.1(12), 51.1(23), 50.1(12).

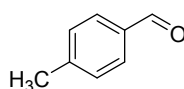

$^1\text{H NMR}$  (400 MHz,  $\text{CDCl}_3$ )  $\delta$  9.95 (s, 1H), 7.77 (d,  $J$  = 7.8 Hz, 2H), 7.32 (d,  $J$  = 7.8 Hz, 2H), 2.43 (s, 3H). GC-MS (EI, 70 ev)  $m/z$  (%) =121.2 ([M]<sup>+</sup>, 10), 120.2(93), 119.2(100), 92.2(14), 91.2(96), 89.2(14), 65.1(30), 63.1(17).

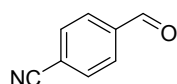

$^1\text{H NMR}$  (400 MHz,  $\text{CDCl}_3$ )  $\delta$  10.10 (s, 1H), 8.00 (d,  $J$  = 8.2 Hz, 2H), 7.85 (d,  $J$  = 8.1 Hz, 2H). GC-MS (EI, 70 ev)  $m/z$  (%) =132.1 ([M]<sup>+</sup>, 10), 131.1(83), 130.1(100), 103.1(21), 102.1(67), 76.1(29), 75.1(24), 51.1(11), 50.1(14).

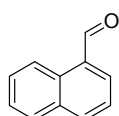

$^1\text{H NMR}$  (400 MHz,  $\text{CDCl}_3$ )  $\delta$  10.39 (s, 1H), 9.26 (d,  $J$  = 8.6 Hz, 1H), 8.08 (d,  $J$  = 8.2 Hz, 1H), 7.97 (d,  $J$  = 7.0 Hz, 1H), 7.91 (d,  $J$  = 8.2 Hz, 1H), 7.69 (t,  $J$  = 7.7 Hz, 1H), 7.65-7.60 (m, 1H), 7.58 (d,  $J$  = 7.9 Hz, 1H). GC-MS (EI, 70 ev)  $m/z$  (%) =157.2 ([M]<sup>+</sup>, 15), 156.2(100), 155.2(69), 129.2(12), 128.2(91), 127.2(88), 126.2(29), 102.1(10), 101.1(12), 77.1(15), 75.1(13).

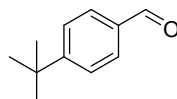

$^1\text{H NMR}$  (400 MHz,  $\text{CDCl}_3$ )  $\delta$  9.98 (s, 1H), 7.82 (d,  $J$  = 8.3 Hz, 2H), 7.55 (d,  $J$  = 8.2 Hz, 2H), 1.35 (s, 9H). GC-MS (EI, 70 ev)  $m/z$  (%) =162.2 ([M]<sup>+</sup>, 45), 148.2(19), 147.2(100), 119.1(40), 115.1(13), 91.2(58), 77.1(15).

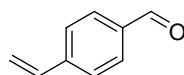

$^1\text{H NMR}$  (400 MHz,  $\text{CDCl}_3$ )  $\delta$  9.98 (s, 1H), 7.84 (d,  $J$  = 8.1 Hz, 2H), 7.55 (d,  $J$  = 8.1 Hz, 2H),

6.77 (dd,  $J = 17.6, 10.9$  Hz, 1H), 5.91 (d,  $J = 17.6$  Hz, 1H), 5.44 (d,  $J = 10.9$  Hz, 1H). GC-MS (EI, 70 ev)  $m/z$  (%) = 133.2 ([M]<sup>+</sup>, 12), 132.2(97), 131.2(100), 104.2(16), 103.2(74), 102.2(16), 78.1(11), 77.1(47), 51.1(20), 50.1(10).

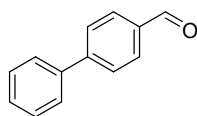

<sup>1</sup>H NMR (400 MHz, CDCl<sub>3</sub>)  $\delta$  10.06 (s, 1H), 7.96 (d,  $J = 8.2$  Hz, 2H), 7.76 (d,  $J = 8.1$  Hz, 2H), 7.64 (d,  $J = 7.1$  Hz, 2H), 7.49 (t,  $J = 7.4$  Hz, 2H), 7.42 (t,  $J = 7.3$  Hz, 1H). GC-MS (EI, 70 ev)  $m/z$  (%) = 183.2 ([M]<sup>+</sup>, 18), 182.2(99), 181.2(100), 154.2(16), 153.2(56), 152.2(78), 151.2(26), 77.1(10), 76.1(16).

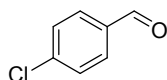

<sup>1</sup>H NMR (400 MHz, DMSO)  $\delta$  10.01 (s, 1H), 7.93 (d,  $J = 7.4$  Hz, 2H), 7.69 (d,  $J = 8.1$  Hz, 2H). GC-MS (EI, 70 ev)  $m/z$  (%) = 142.1 ([M]<sup>+</sup>, 26), 141.1(40), 140.1(76), 139.1(100), 113.1(18), 111.1(56), 77.1(14), 75.1(26), 74.1(14), 50.1(14).

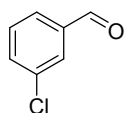

<sup>1</sup>H NMR (400 MHz, CDCl<sub>3</sub>)  $\delta$  9.96 (d,  $J = 3.2$  Hz, 1H), 7.84 (s, 1H), 7.76 (d,  $J = 7.6$  Hz, 1H), 7.59 (d,  $J = 7.9$  Hz, 1H), 7.48 (t,  $J = 7.8$  Hz, 1H). GC-MS (EI, 70 ev)  $m/z$  (%) = 142.1 ([M]<sup>+</sup>, 34), 141.1(48), 140.1(85), 139.1(100), 113.1(24), 112.1(12), 111.1(64), 77.1(25), 76.1(12), 75.1(32), 74.1(18), 51.1(13), 50.1(19).

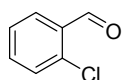

<sup>1</sup>H NMR (400 MHz, CDCl<sub>3</sub>)  $\delta$  10.47 (s, 1H), 7.91 (d,  $J = 7.7$  Hz, 1H), 7.52 (t,  $J = 7.6$  Hz, 1H), 7.44 (d,  $J = 8.1$  Hz, 1H), 7.38 (t,  $J = 7.5$  Hz, 1H). GC-MS (EI, 70 ev)  $m/z$  (%) = 142.1 ([M]<sup>+</sup>, 32), 141.1(49), 140.1(84), 139.1(100), 113.1(18), 112.1(12), 111.1(51), 77.1(24), 76.1(24), 75.1(31), 74.1(18), 51.1(13), 50.1(22).

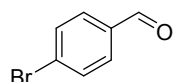

<sup>1</sup>H NMR (400 MHz, CDCl<sub>3</sub>)  $\delta$  9.98 (s, 1H), 7.75 (d,  $J = 8.3$  Hz, 2H), 7.69 (d,  $J = 8.1$  Hz, 2H). GC-MS (EI, 70 ev)  $m/z$  (%) = 186.1 ([M]<sup>+</sup>, 73), 185.1(100), 184.1(74), 183.1(98), 157.0(49), 155.0(50), 77.1(24), 76.1(25), 75.1(26), 74.1(23), 51.1(24), 50.1(25).

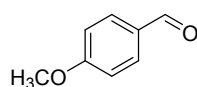

<sup>1</sup>H NMR (400 MHz, CDCl<sub>3</sub>)  $\delta$  9.87 (d,  $J = 3.4$  Hz, 1H), 7.93-7.71 (m, 2H), 6.99 (dd,  $J = 8.9, 2.1$  Hz, 2H), 3.99-3.77 (m, 3H). GC-MS (EI, 70 ev)  $m/z$  (%) = 137.2 ([M]<sup>+</sup>, 10), 136.2(86),

135.2(100), 107.1(25), 92.1(25), 77.1(39), 65.1(13), 64.1(12), 63.1(14).

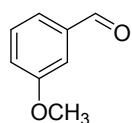

<sup>1</sup>H NMR (400 MHz, CDCl<sub>3</sub>) δ 9.96 (s, 1H), 7.44 (s, 1H), 7.43 (d, *J* = 3.3 Hz, 1H), 7.38 (s, 1H), 7.16 (d, *J* = 6.6 Hz, 1H), 3.85 (s, 3H). GC-MS (EI, 70 ev) *m/z* (%) = 137.2 ([M]<sup>+</sup>, 13), 136.2(100), 135.2(99), 107.1(49), 92.1(24), 78.1(11), 77.1(42), 65.1(22), 64.1(15), 63.1(19).

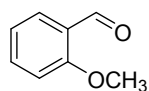

<sup>1</sup>H NMR (400 MHz, CDCl<sub>3</sub>) δ 10.46 (s, 1H), 7.81 (d, *J* = 7.7 Hz, 1H), 7.54 (t, *J* = 7.9 Hz, 1H), 7.00 (dd, *J* = 16.7, 8.1 Hz, 2H), 3.91 (s, 3H). GC-MS (EI, 70 ev) *m/z* (%) = 137.1 ([M]<sup>+</sup>, 11), 136.1(100), 135.1(57), 121.1(20), 119.1(34), 118.1(37), 107.1(15), 105.1(20), 104.1(24), 94.1(11), 93.1(11), 92.1(29), 91.1(19), 90.1(20), 79.1(23), 78.1(26), 77.1(57), 76.1(32), 65.1(23), 64.1(13), 63.1(20), 51.1(16), 50.1(13).

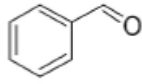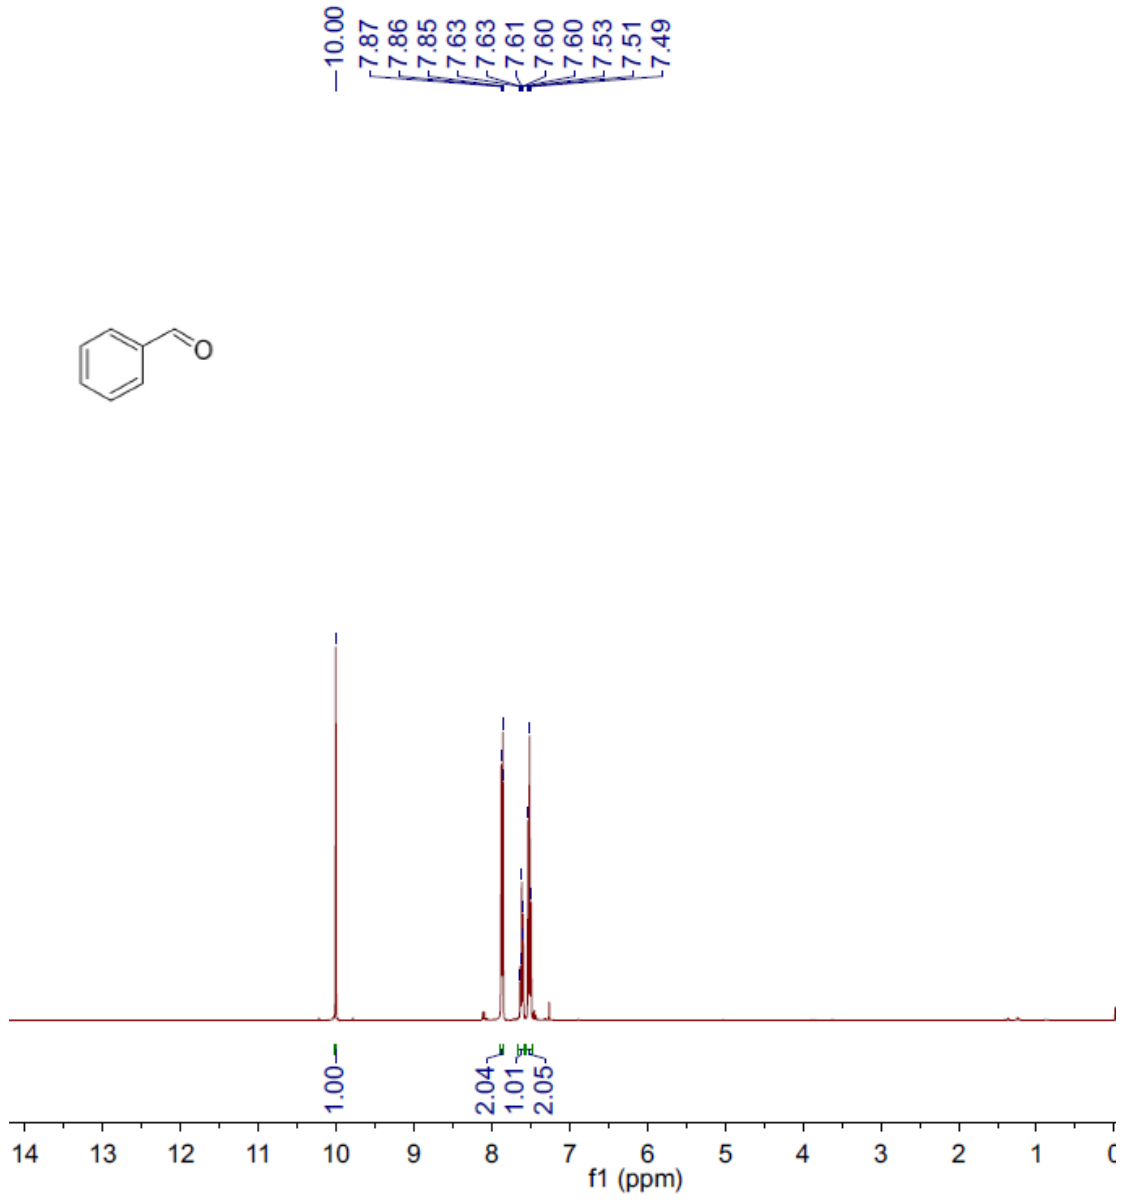

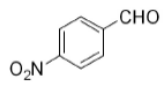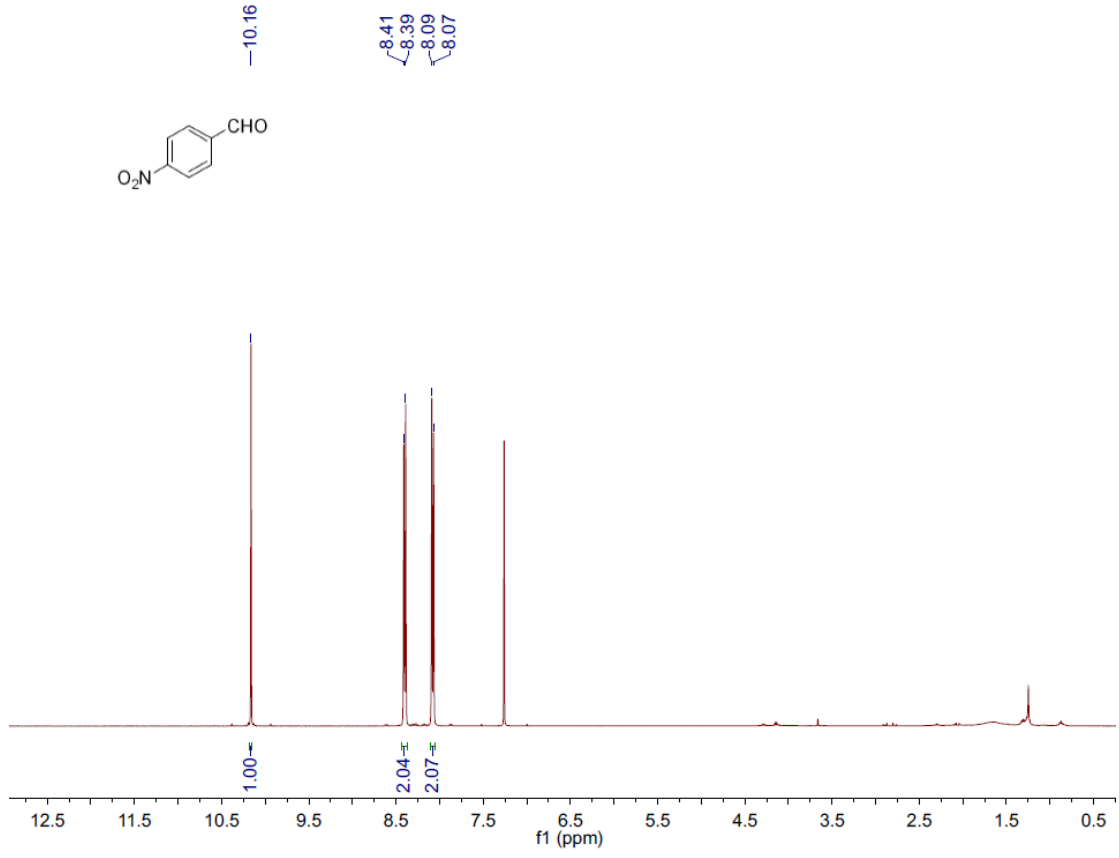

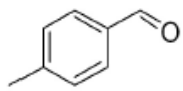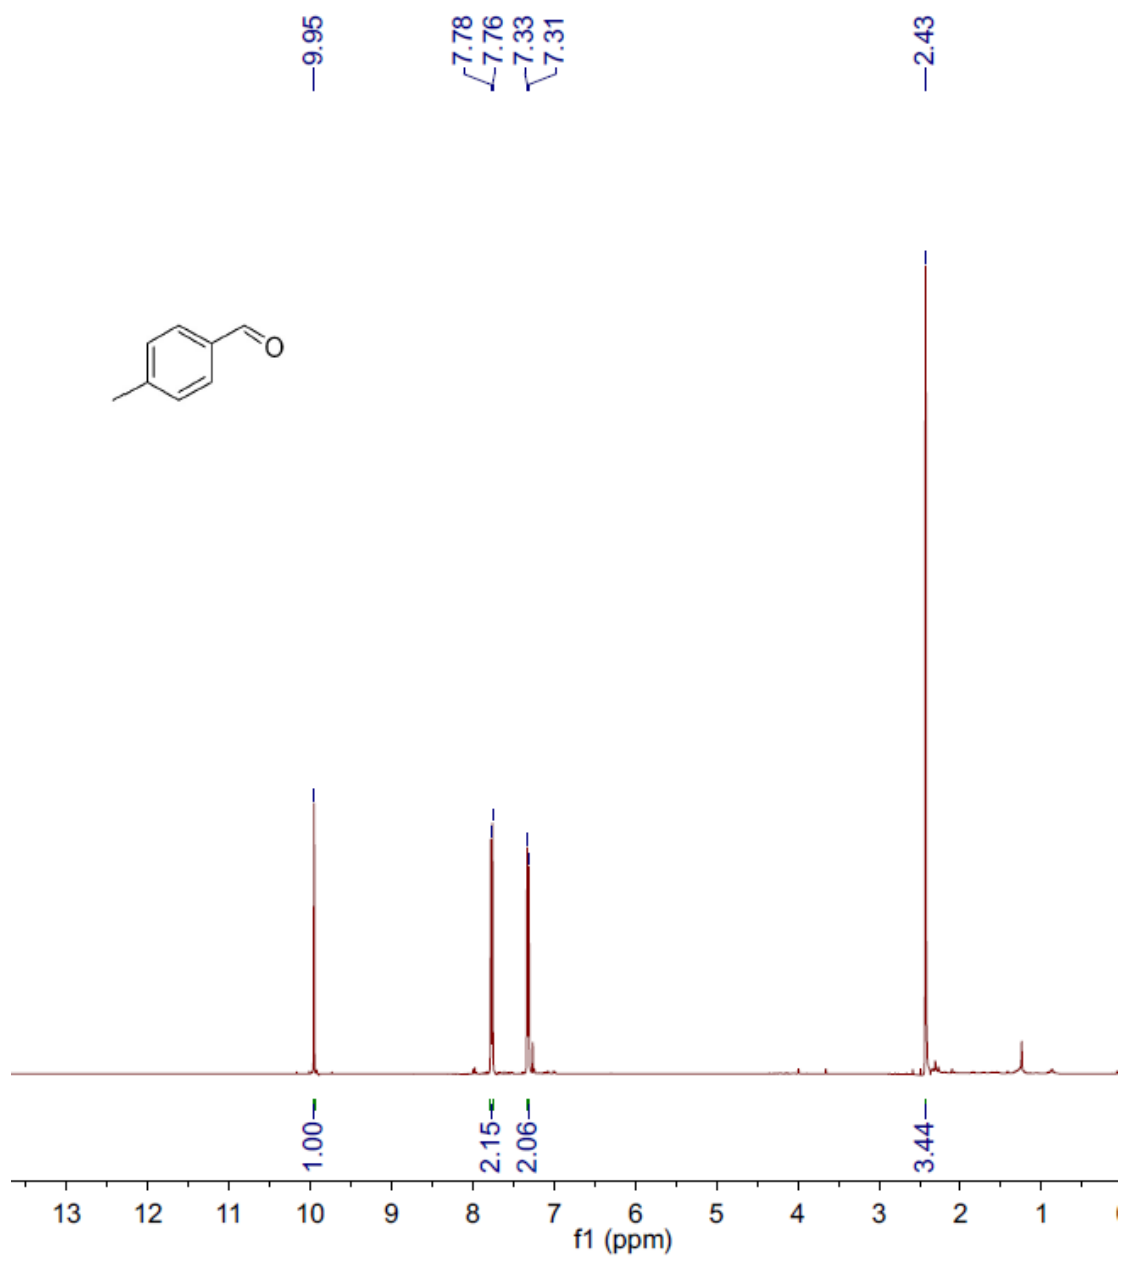

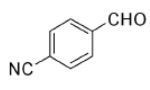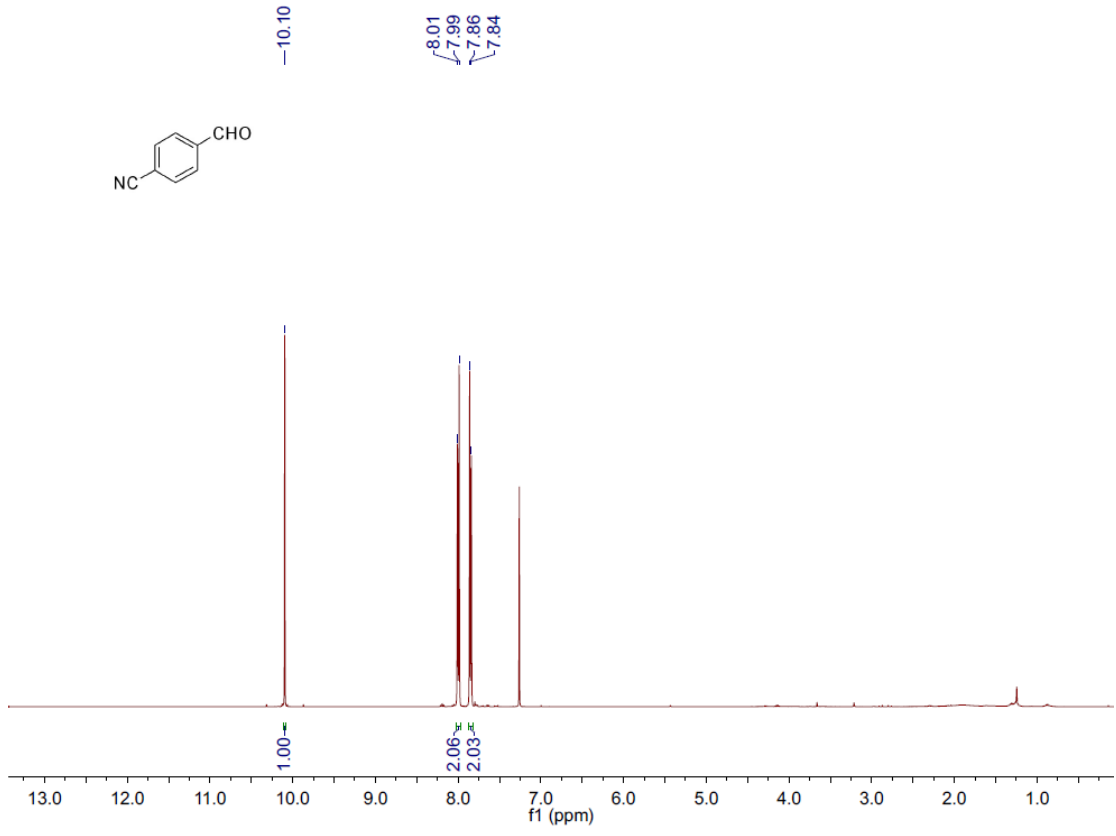

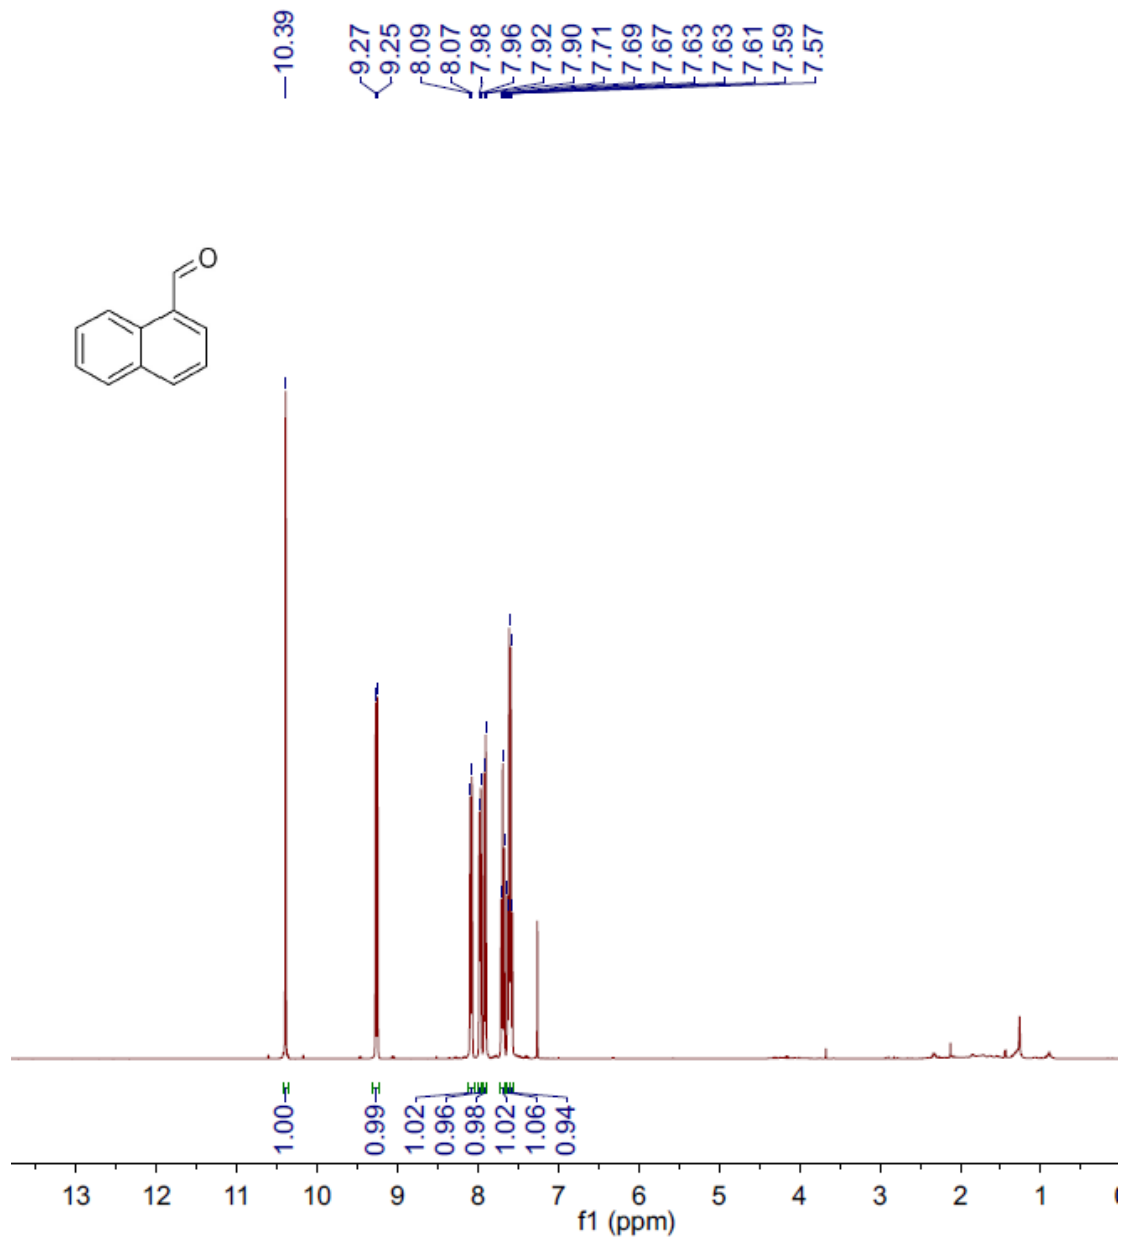



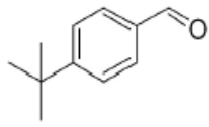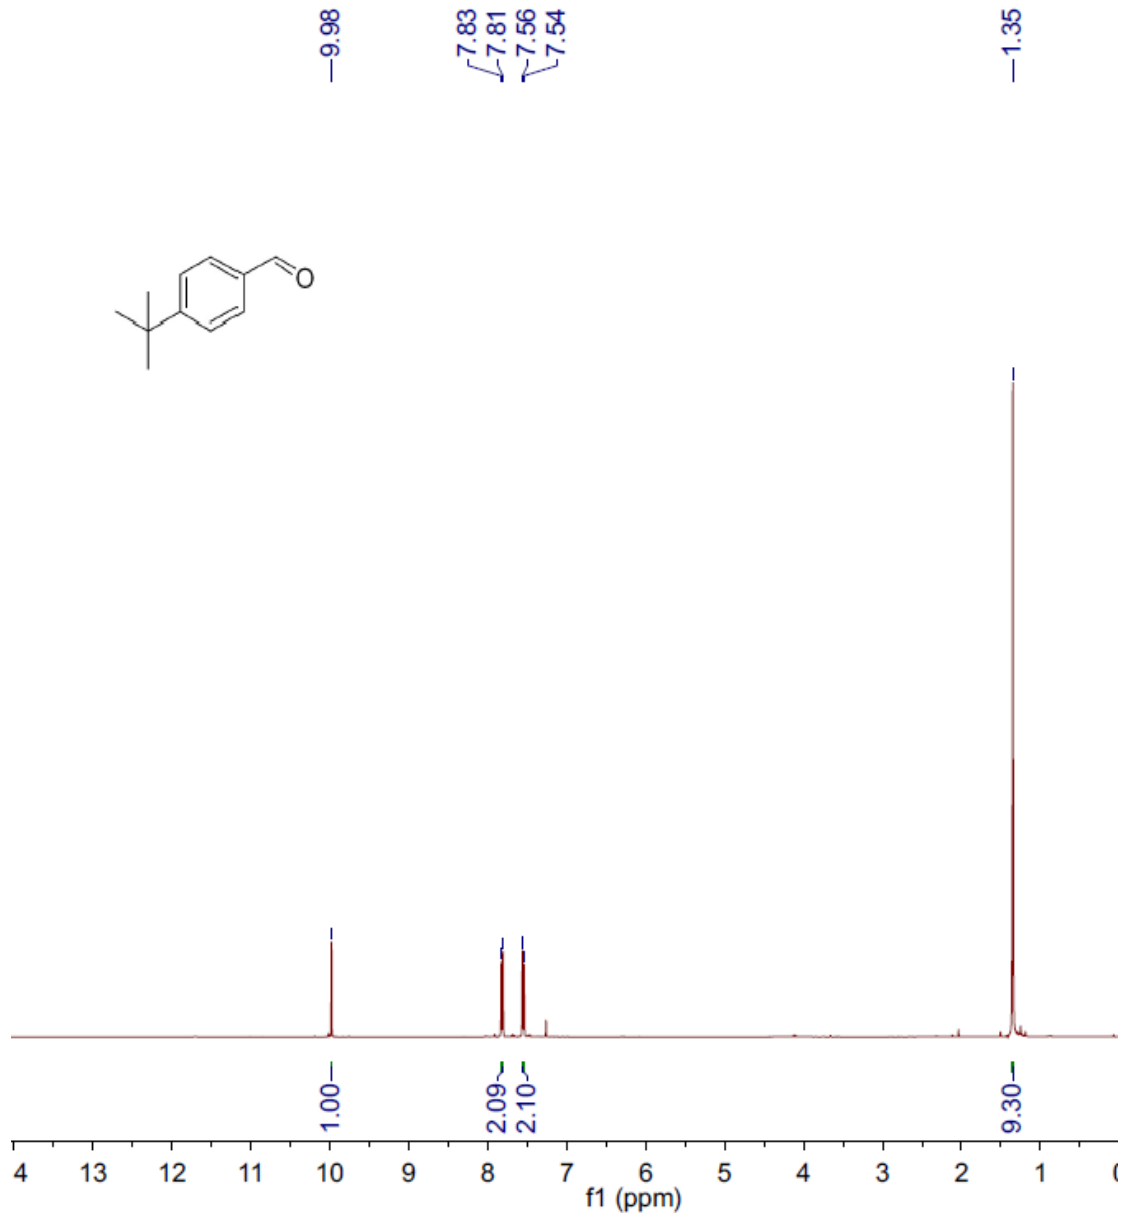

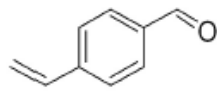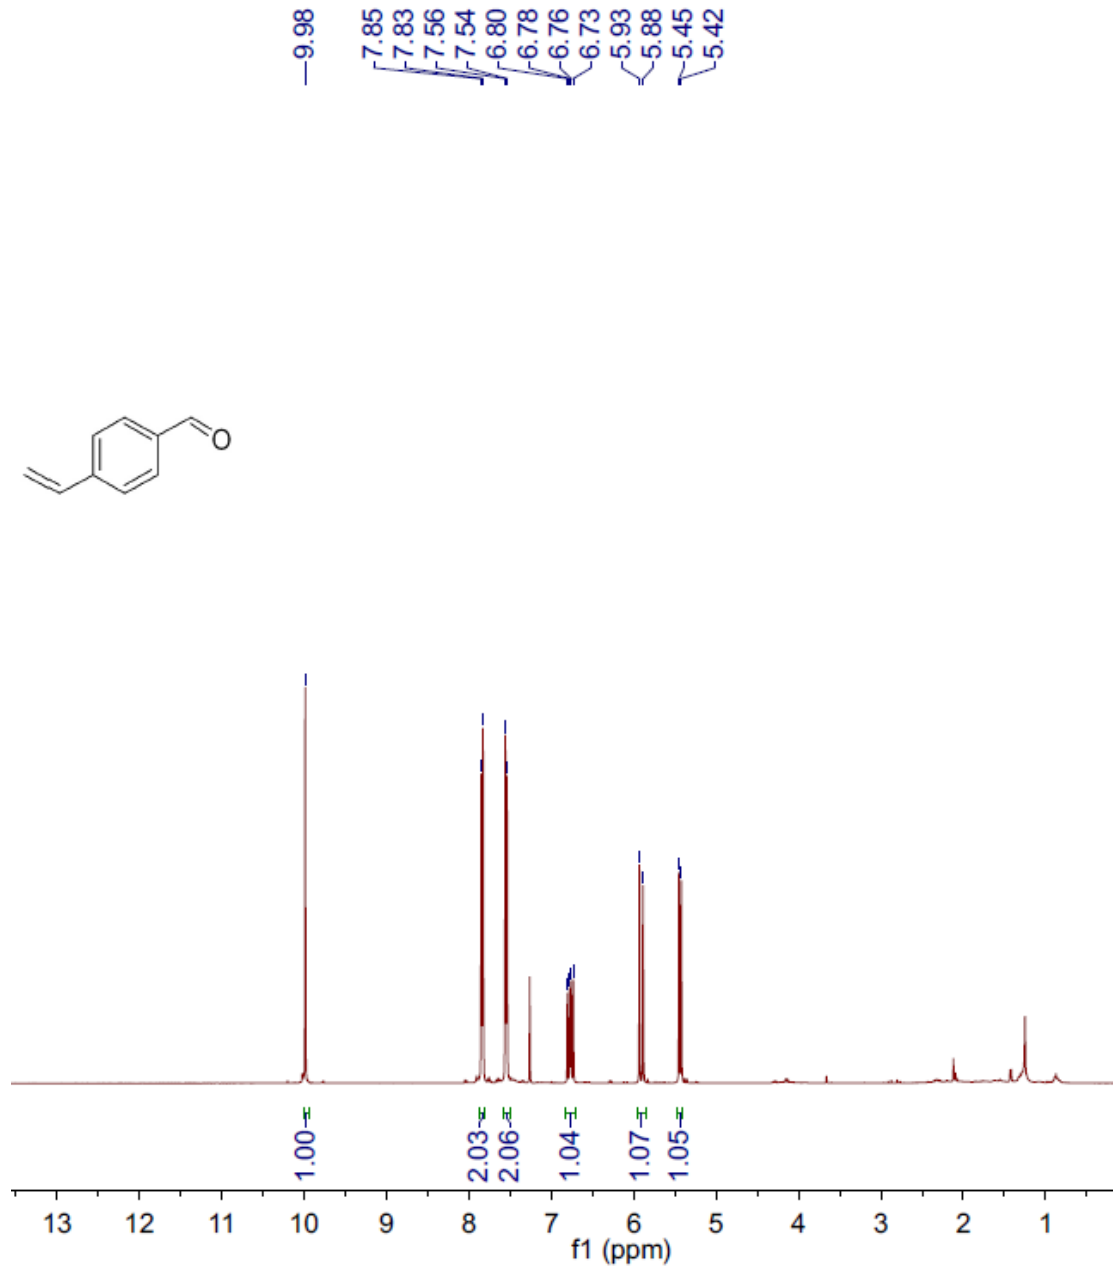

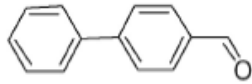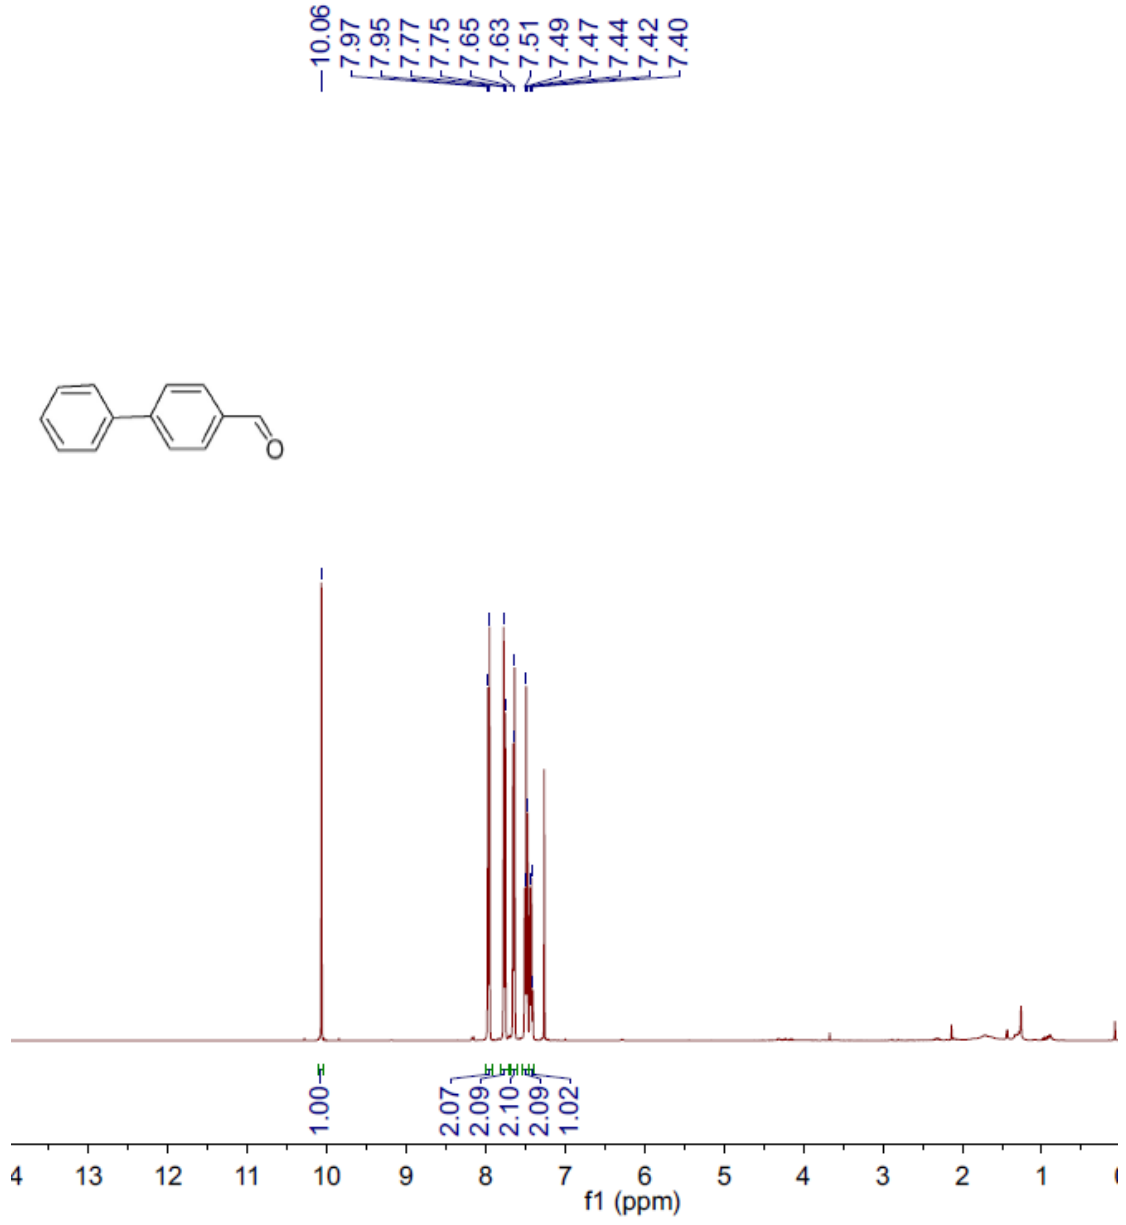

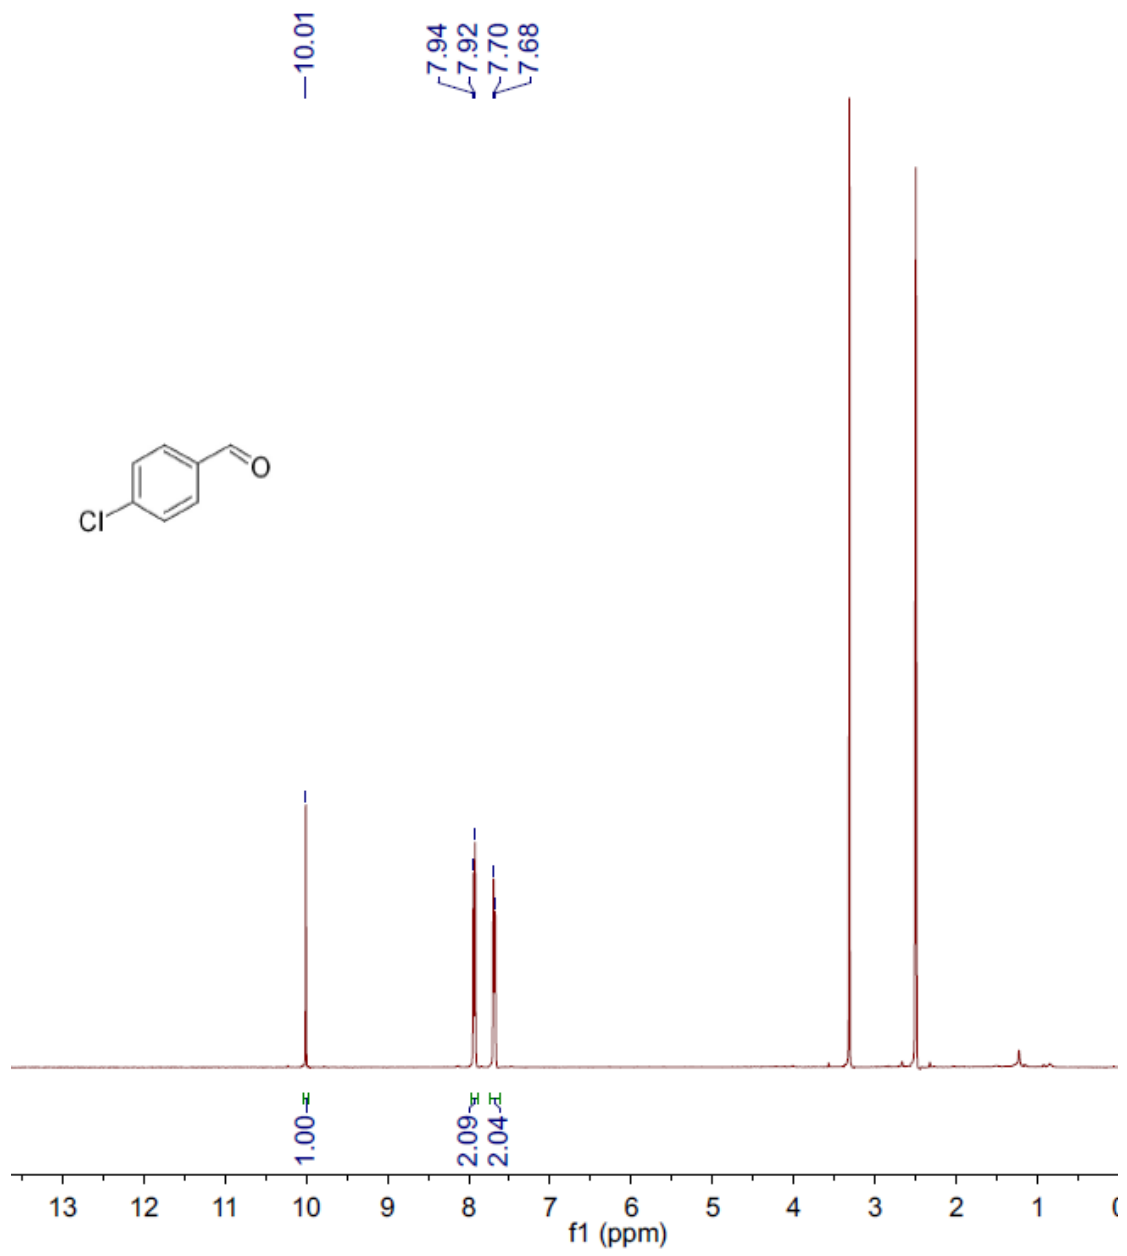

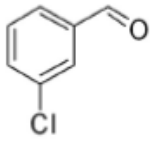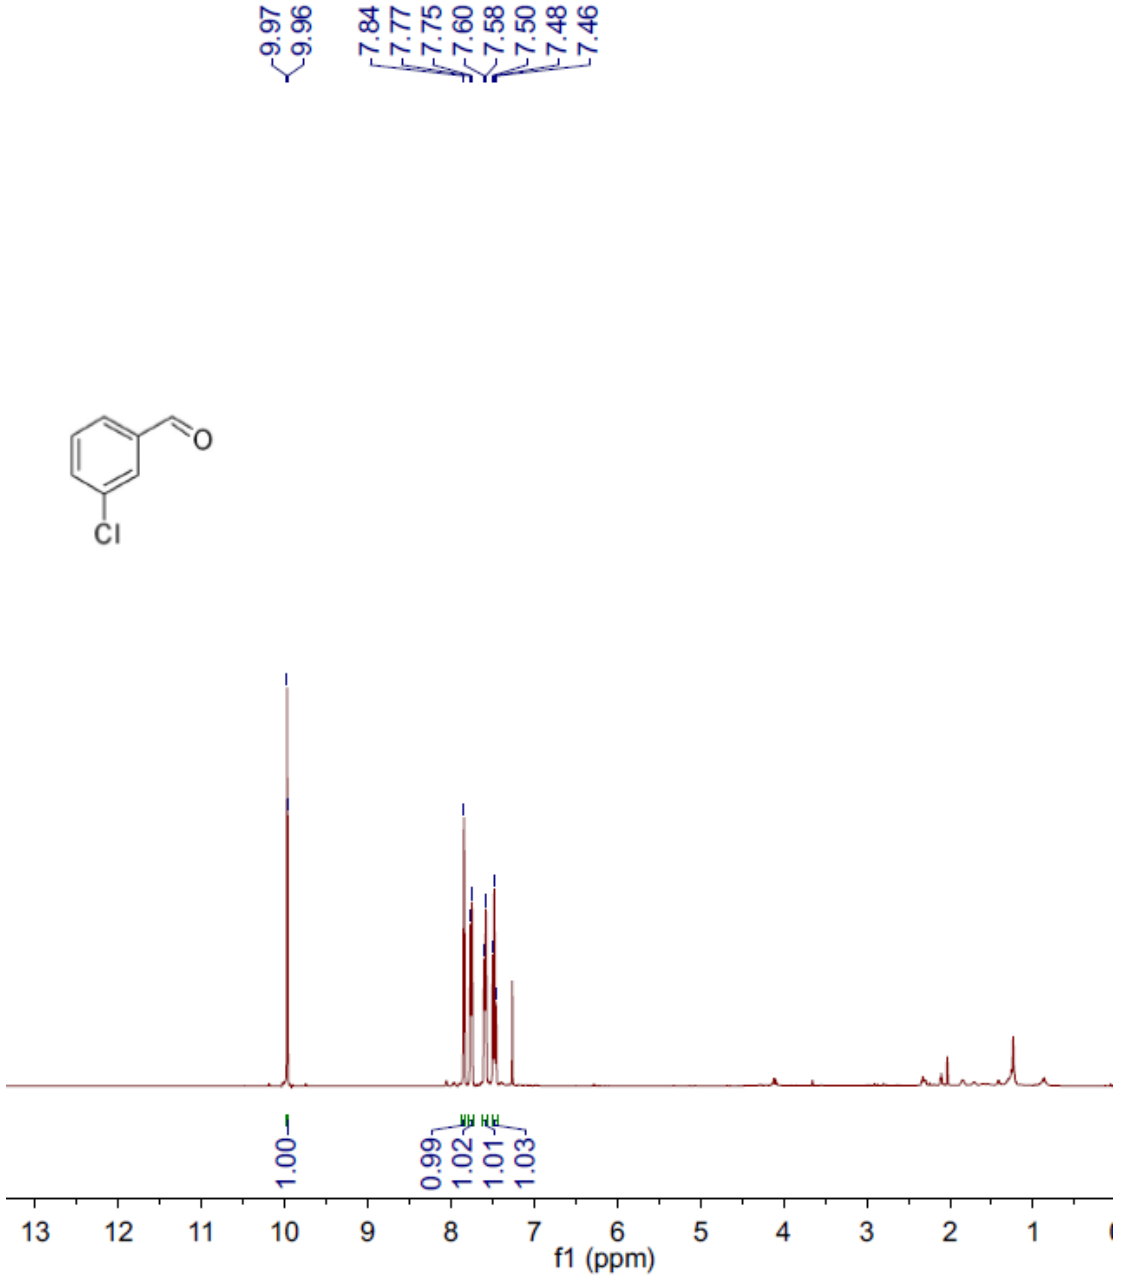

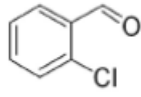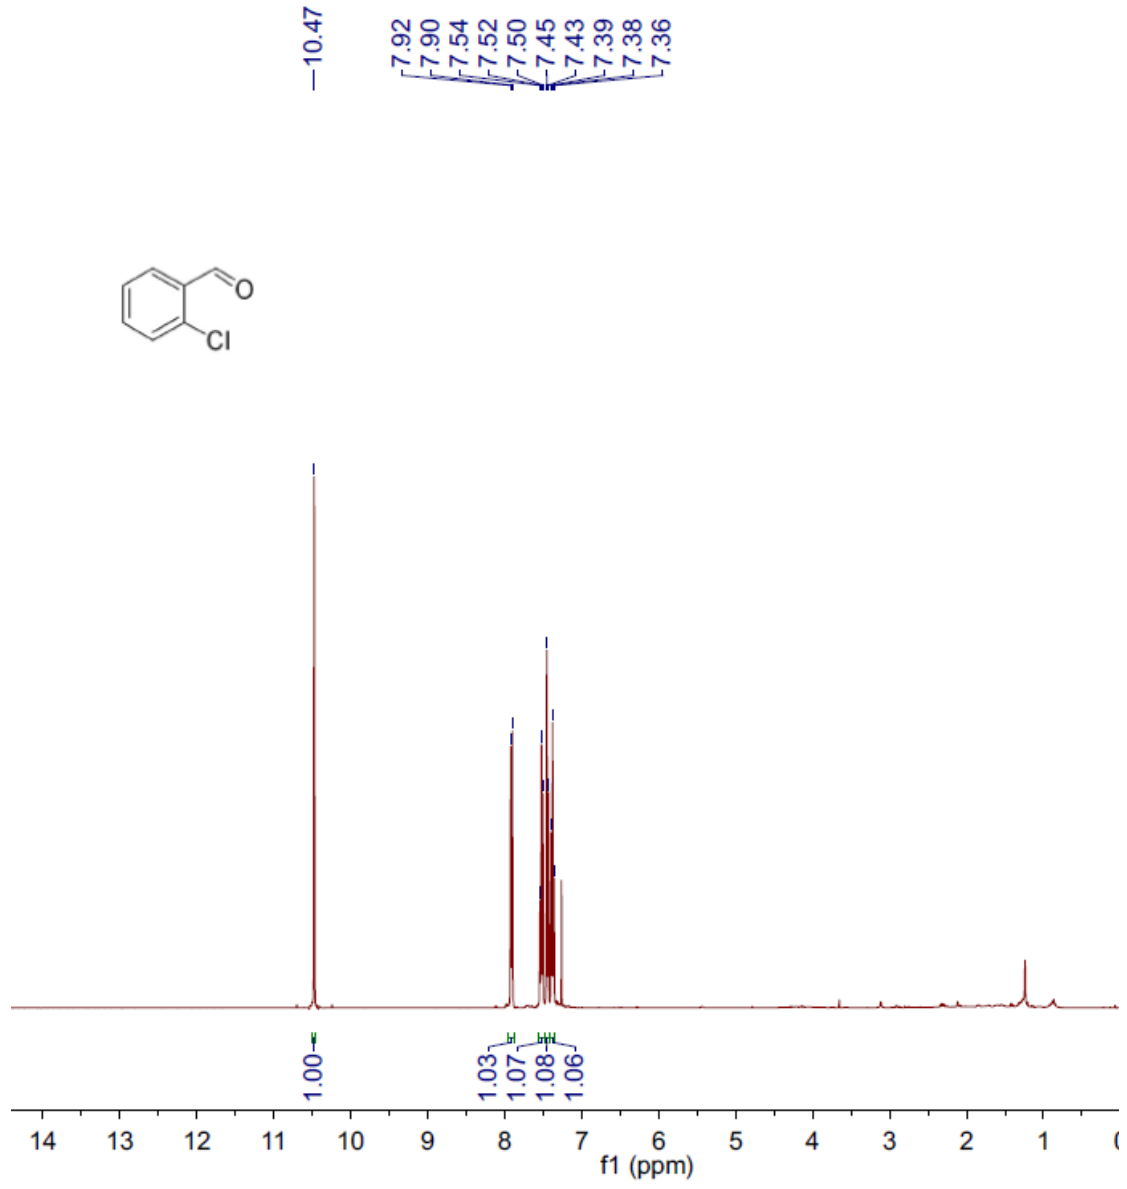

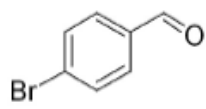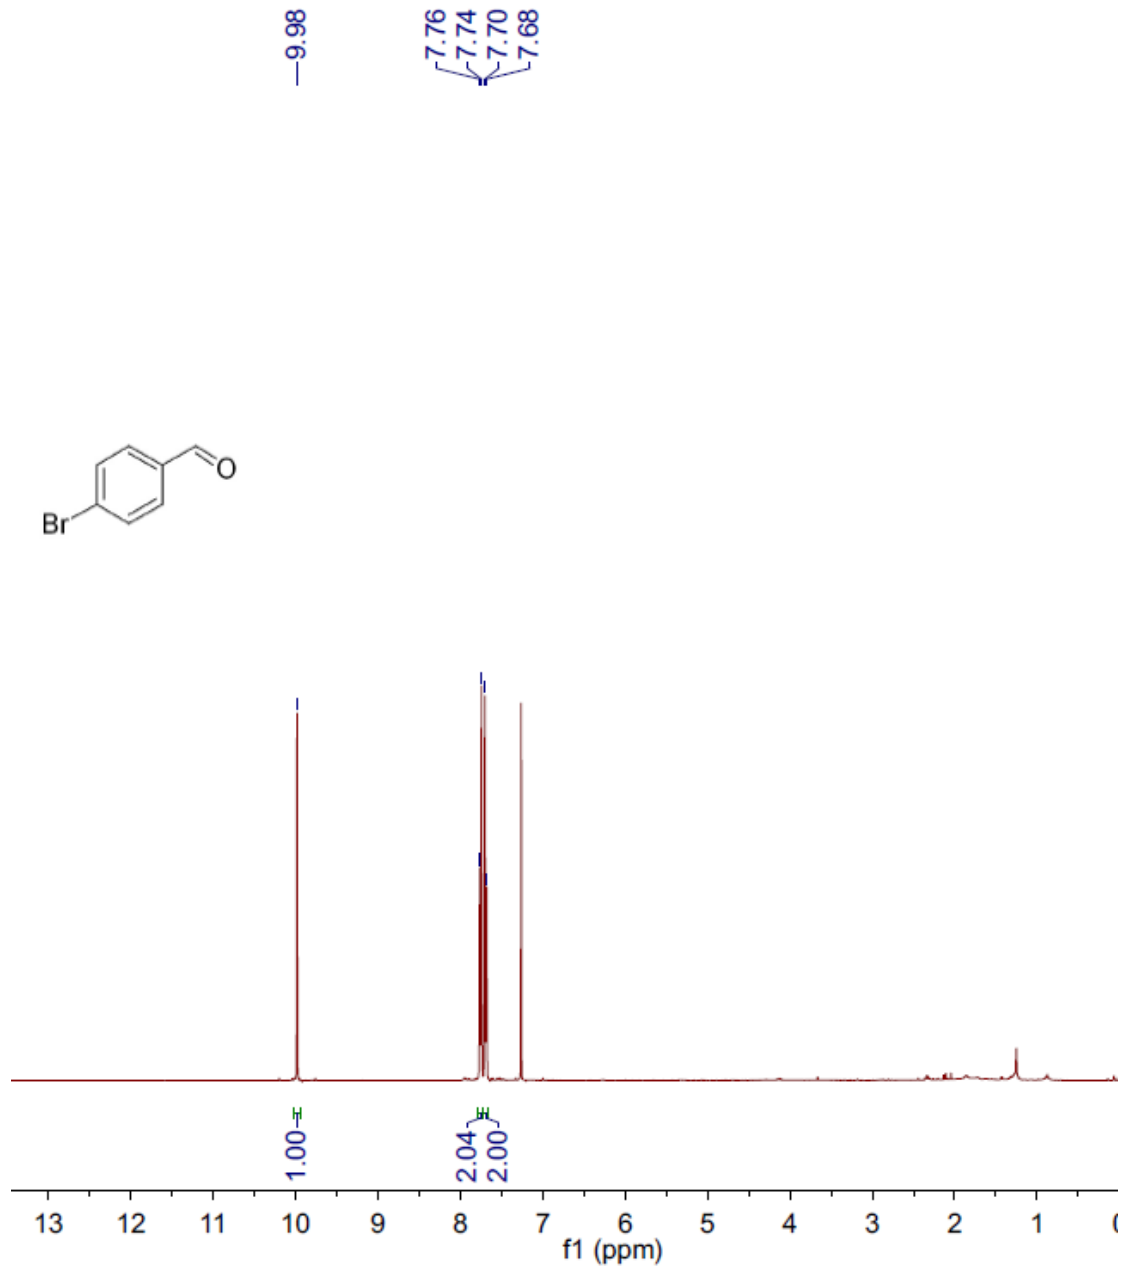

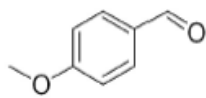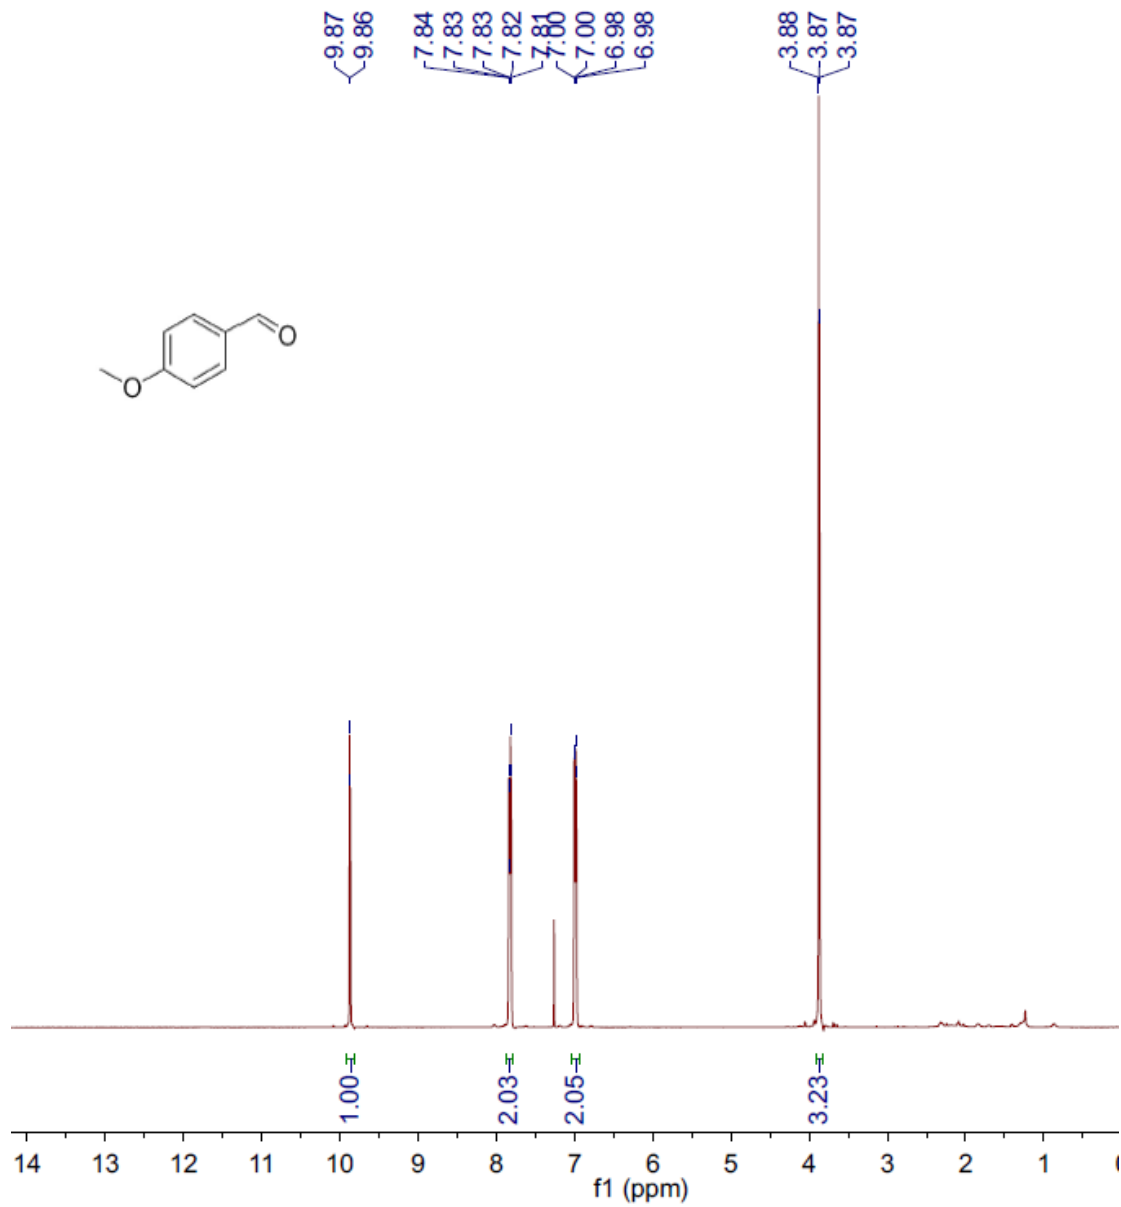



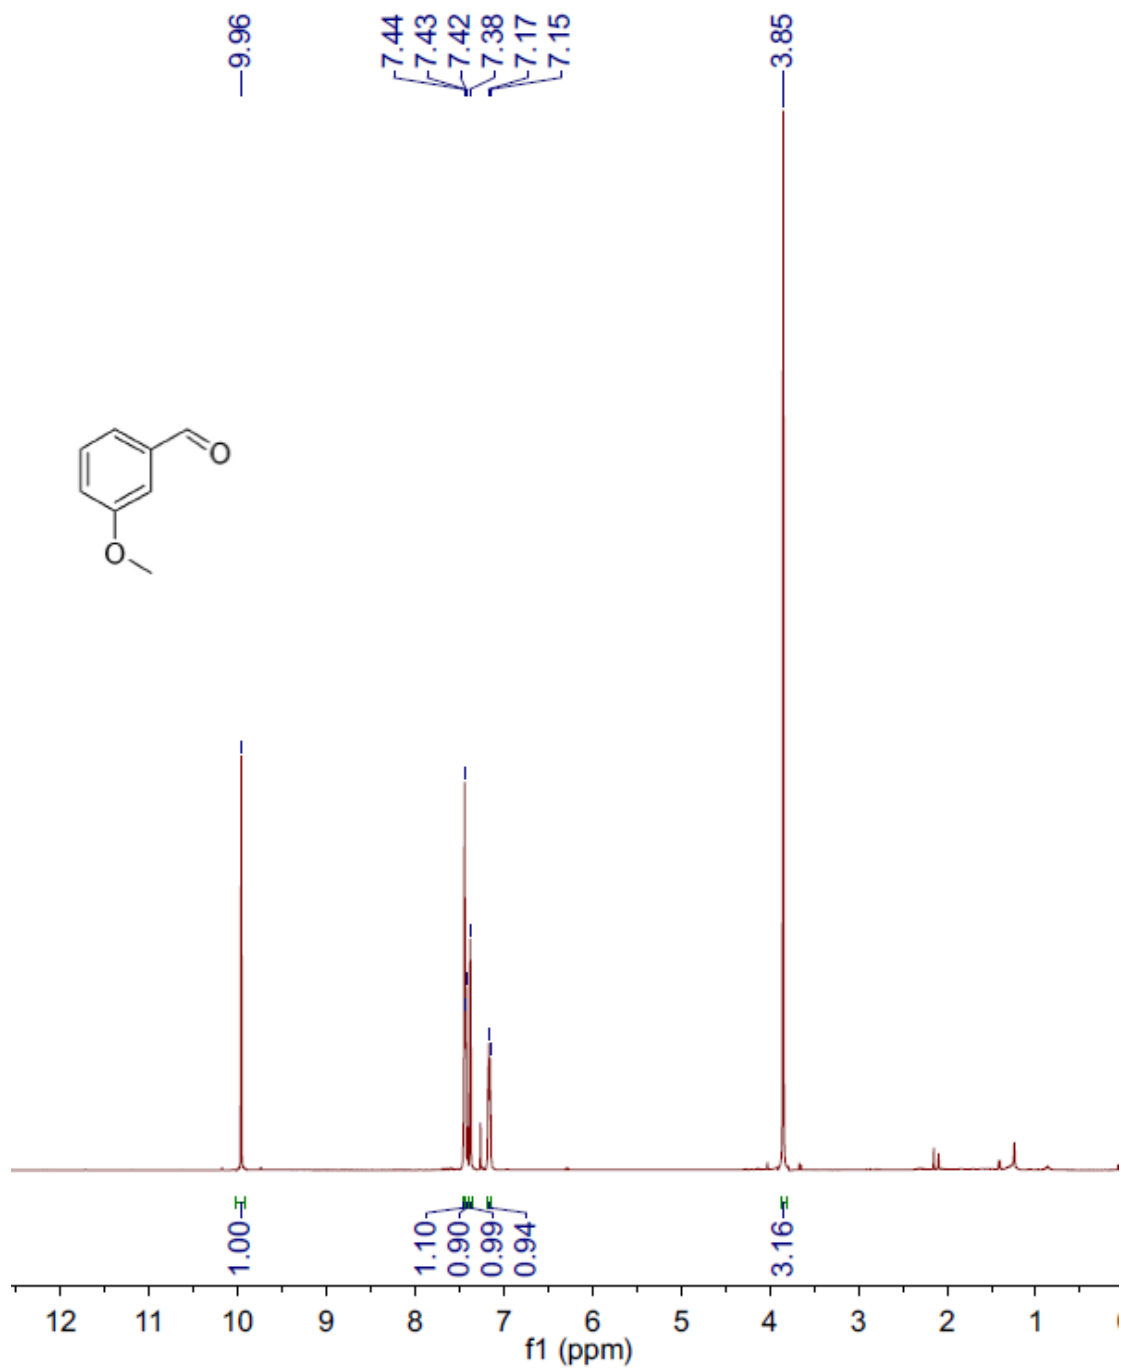

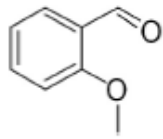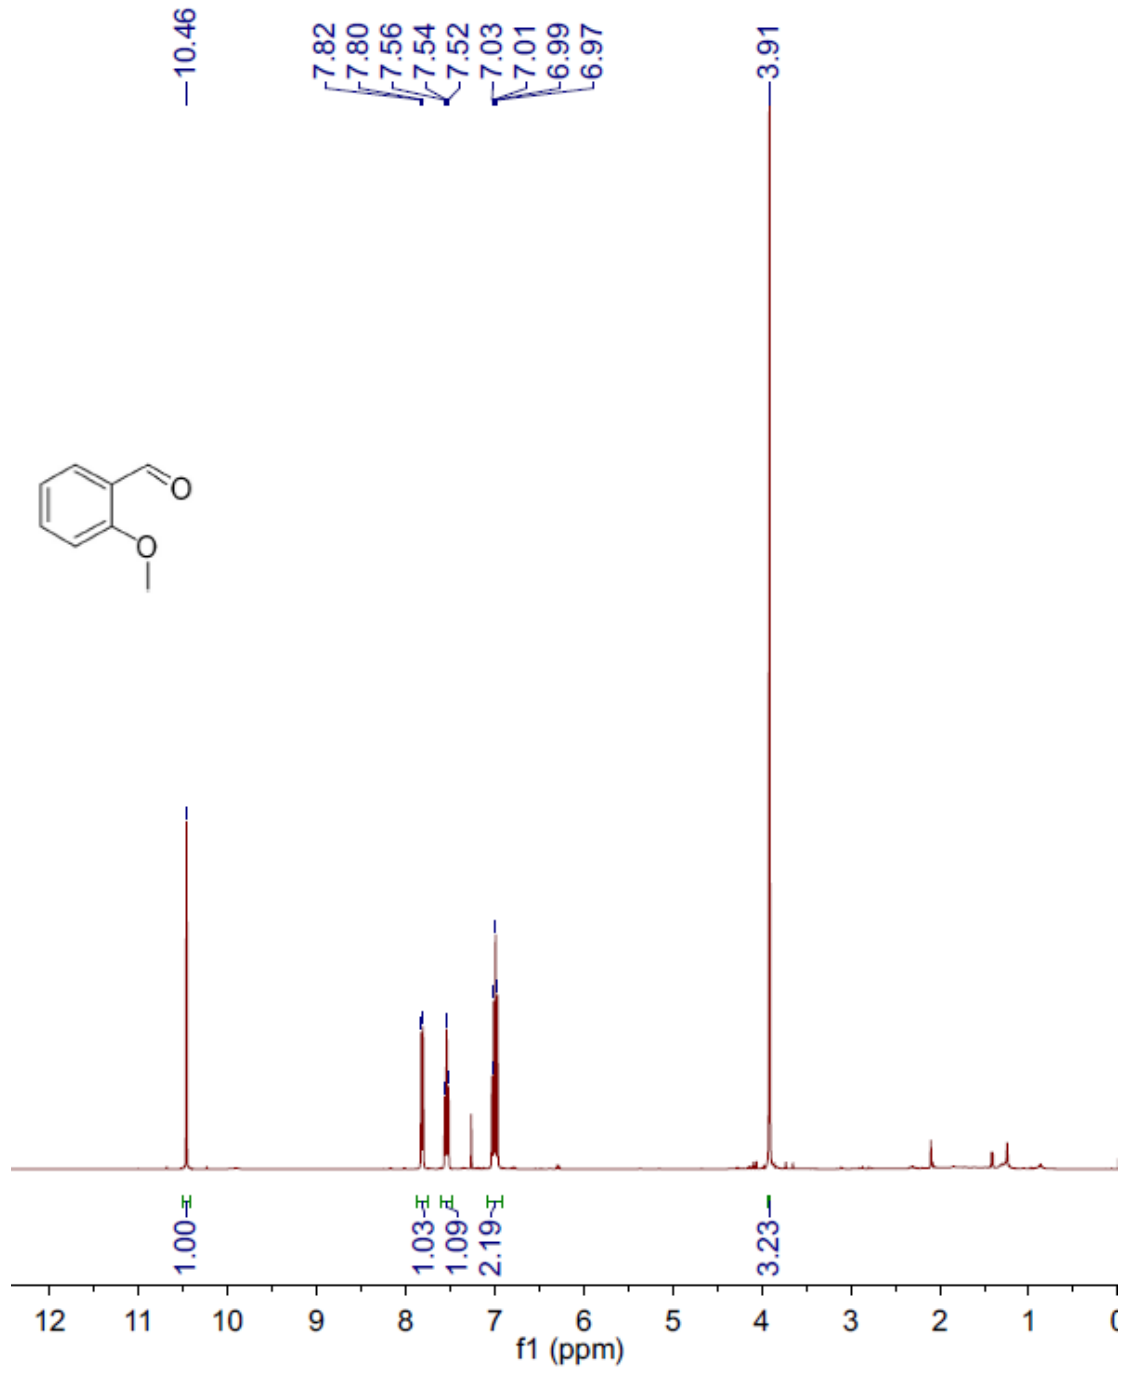

Supplement: c4ob01633e1.pdf [file c4ob01633e1.pdf]
